# Supplementary material
Source: Springer Nature journal article supplement (https://www.springermedizin.de/resource/supplementary/12891_2013_2037_MOESM2_ESM.pdf/9510070)

# Variance processes

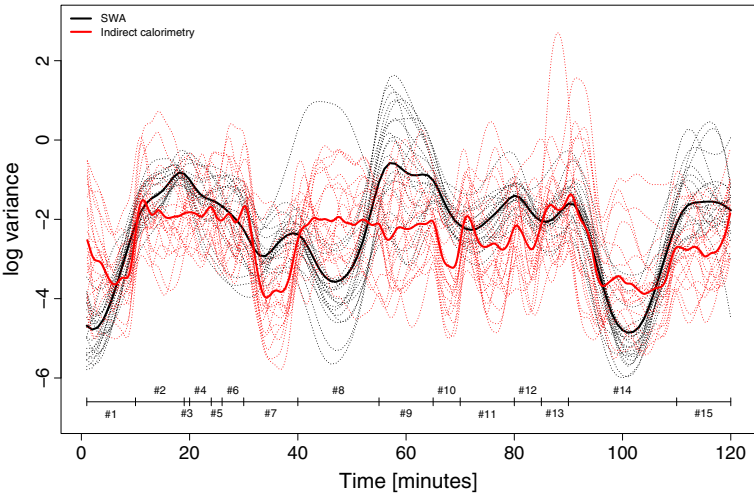

Supplement: MOESM2 [file 9510070]
